# Supplementary material
Source: publisher figshare collection journal article supplement (https://gsajournals.figshare.com/ndownloader/files/13477388)
Supplement: Supplementary file 1 [file 13477388]

## Sheet: Sheet1
Table S1. Assembly reconciliation process with de novo heterochromatin-enriched assemblies shaded in gray.
Assembly 1	Assembly 2	Merging Method	Reference used	Merged assembly name
Falcon 1	Canu 2	quickmerge	Canu 2	Merged 1
Merged 1	Falcon 2	quickmerge	Merged 1	Merged 2
Manual Curation 1
Merged 2	R6 major armsa	cat	NA	Merged 3
Manual Curation 2
Merged 3	ISO_mergedb	quickmerge	Merged 3	Merged 4
Merged 4	Canu 1	quickmerge	Merged 4	Final merged
Manual Curation 3
Final_polished
Manual Curation 1
Added missing sequences from kl-2, kl-3, kl-5, CCY, Ory and Ppry using manual alignments of Pacbio raw reads
Replaced part of kl-2 and wdy with 'Falcon2' contigs
Manual Curation 2
Replaced Rsp region using the assembly from KHOST et al. 2017
Manual Curation 3
Split 9 misjoined contigs in 'Final merged', replaced with 'Merge4' contigs
There were 6 contigs missing from 'Final merged' after the Quickmerge step that contained genes. Added these 6 contigs from the 'Merged '4 assembly back to the 'Final merged' assembly.
Fixed one kl-3 misassembly by correcting the assembly at a misjoined site caused by tandem repeats
Added part of Ppr-Y using R6 assembly (short contig)
Replaced Mst77Y and Sdic regions with the assemblies from KRSTICEVIC et al. 2015 and CLIFTON et al. 2017
Replaced 16HT Y-linked region with R6 assembly (MENDEZ-LAGO et al. 2009)
Replaced mitochondrial sequences with R6 assembly
a. from Hoskins et al. 2015.
b. from Chakraborty et al. 2016
Please see supplementary methods for the source of the assemblies
